# Supplementary material
Source: HighWire-hosted journal article supplement (https://msystems.asm.org/content/2/2/e00144-16)
Supplement: inline-supplementary-material-2 [file inline-supplementary-material-2.pdf]

| Metadata              | V                 | $\beta$           | $\bar{R}^2$ | $V_{st}$      | $\beta_{st}$   |
|-----------------------|-------------------|-------------------|-------------|---------------|----------------|
| Ab                    | $0.35 \pm 0.07$   | $0.81 \pm 0.04$   | 0.925       | $4.3 \pm 1.4$ | $1.3 \pm 0.9$  |
| Ab                    | $0.41 \pm 0.09$   | $0.82 \pm 0.04$   | 0.908       | $5.6 \pm 1.8$ | $1.6 \pm 0.9$  |
| Ab                    | $0.23 \pm 0.04$   | $0.770 \pm 0.031$ | 0.920       | $2.1 \pm 0.8$ | $0.5 \pm 0.7$  |
| Ab                    | $0.165 \pm 0.029$ | $0.738 \pm 0.031$ | 0.928       | $0.9 \pm 0.6$ | $-0.3 \pm 0.7$ |
| Ab                    | $0.34 \pm 0.06$   | $0.812 \pm 0.032$ | 0.936       | $4.1 \pm 1.2$ | $1.5 \pm 0.7$  |
| Ab                    | $0.26 \pm 0.05$   | $0.798 \pm 0.033$ | 0.931       | $2.8 \pm 0.9$ | $1.1 \pm 0.8$  |
| IBS (minor)           | $0.205 \pm 0.034$ | $0.740 \pm 0.029$ | 0.917       | $6.9 \pm 3.3$ | $2.0 \pm 1.2$  |
| IBS (severe)          | $0.35 \pm 0.06$   | $0.793 \pm 0.025$ | 0.934       | $21 \pm 6$    | $4.2 \pm 1.0$  |
| HLS (abroad)          | $0.51 \pm 0.06$   | $0.820 \pm 0.012$ | 0.928       | $2.8 \pm 0.6$ | $1.7 \pm 0.5$  |
| HLS (infection)       | $0.49 \pm 0.08$   | $0.828 \pm 0.018$ | 0.923       | $2.6 \pm 0.9$ | $2.0 \pm 0.7$  |
| HLS (after infection) | $0.36 \pm 0.05$   | $0.776 \pm 0.015$ | 0.922       | $1.1 \pm 0.6$ | $-0.0 \pm 0.6$ |
