# Supplementary material
Source: HighWire-hosted journal article supplement (https://msystems.asm.org/content/2/2/e00144-16)
Supplement: inline-supplementary-material-4 [file inline-supplementary-material-4.pdf]

| Metadata | V                 | $\beta$           | $\bar{R}^2$ | $V_{st}$         | $\beta_{st}$  |
|----------|-------------------|-------------------|-------------|------------------|---------------|
| OW       | $0.59 \pm 0.12$   | $0.894 \pm 0.034$ | 0.920       | $6.6 \pm 2.0$    | $2.6 \pm 1.0$ |
| OW       | $0.22 \pm 0.04$   | $0.830 \pm 0.030$ | 0.904       | $0.5 \pm 0.6$    | $0.7 \pm 0.9$ |
| OBI      | $0.28 \pm 0.04$   | $0.855 \pm 0.022$ | 0.958       | $1.5 \pm 0.6$    | $1.4 \pm 0.6$ |
| OBI      | $0.33 \pm 0.07$   | $0.870 \pm 0.031$ | 0.916       | $2.4 \pm 1.1$    | $1.9 \pm 0.9$ |
| OBII     | $0.223 \pm 0.032$ | $0.823 \pm 0.023$ | 0.938       | $0.6 \pm 0.5$    | $0.5 \pm 0.7$ |
| OBII     | $0.208 \pm 0.029$ | $0.844 \pm 0.022$ | 0.935       | $0.4 \pm 0.5$    | $1.1 \pm 0.7$ |
| OBIII    | $0.34 \pm 0.05$   | $0.855 \pm 0.025$ | 0.943       | $2.5 \pm 0.9$    | $1.4 \pm 0.7$ |
| OBIII    | $0.26 \pm 0.04$   | $0.845 \pm 0.026$ | 0.954       | $1.1 \pm 0.7$    | $1.2 \pm 0.8$ |
| OBIII    | $0.33 \pm 0.06$   | $0.870 \pm 0.027$ | 0.908       | $2.4 \pm 1.0$    | $1.9 \pm 0.8$ |
| OBIII    | $0.200 \pm 0.026$ | $0.843 \pm 0.020$ | 0.949       | $0.2 \pm 0.4$    | $1.1 \pm 0.6$ |
| OBIII    | $0.30 \pm 0.05$   | $0.846 \pm 0.026$ | 0.929       | $1.9 \pm 0.8$    | $1.2 \pm 0.7$ |
| OBIII    | $0.176 \pm 0.029$ | $0.826 \pm 0.026$ | 0.894       | $-0.2 \pm 0.5$   | $0.6 \pm 0.8$ |
| OBIII    | $0.30 \pm 0.06$   | $0.841 \pm 0.031$ | 0.896       | $1.8 \pm 0.9$    | $1.0 \pm 0.9$ |
| OBIII    | $0.28 \pm 0.04$   | $0.857 \pm 0.025$ | 0.941       | $1.5 \pm 0.7$    | $1.5 \pm 0.7$ |
| OBIII    | $0.122 \pm 0.018$ | $0.822 \pm 0.024$ | 0.930       | $-1.05 \pm 0.30$ | $0.5 \pm 0.7$ |
| OBIIIId  | $0.47 \pm 0.08$   | $0.872 \pm 0.023$ | 0.945       | $4.7 \pm 1.3$    | $1.9 \pm 0.7$ |
| OBIIIId  | $0.38 \pm 0.06$   | $0.846 \pm 0.023$ | 0.951       | $3.2 \pm 1.0$    | $1.2 \pm 0.7$ |
| OBIIIId  | $0.36 \pm 0.06$   | $0.842 \pm 0.022$ | 0.954       | $2.9 \pm 0.9$    | $1.1 \pm 0.6$ |
